# Supplementary material for: Elevated expression of HSP90 and the antitumor effect of an HSP90 inhibitor via inactivation of the Akt/mTOR pathway in undifferentiated pleomorphic sarcoma
Source: PubMed Central journal article supplement (PMC4623920; doi:10.1186/s12885-015-1830-8), 2015-10-26
Supplement: 12885_2015_1830_MOESM3_ESM.pdf [file 12885_2015_1830_MOESM3_ESM.pdf]

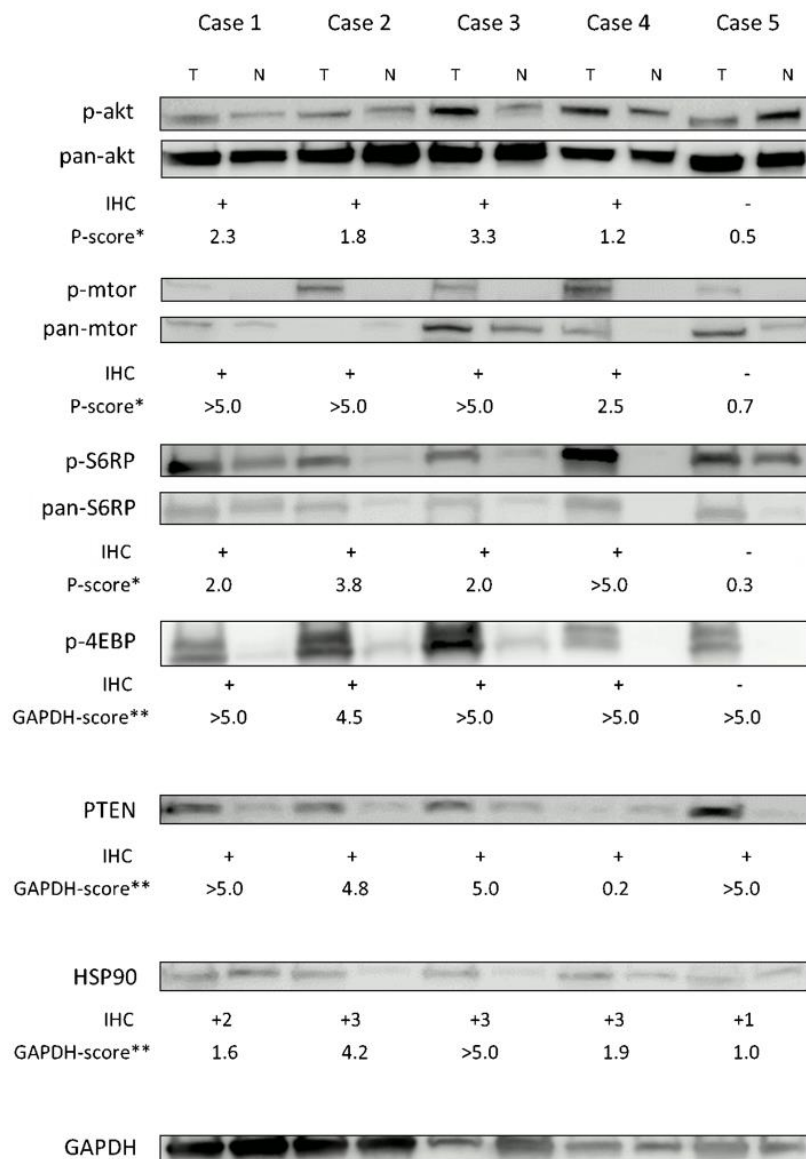

\*P-score: (p-protein [tumor] / pan-protein [tumor]) / (p-protein [normal] / pan-protein [normal])

\*\*GAPDH-score: (protein [tumor] / GAPDH [tumor]) / (protein[normal] / actin [normal])

**Additional Fig. 1.** Protein expression analysis by Western blot analysis. p-Akt, p-mTOR, p-S6RP and p-4EBP were detected in all tumor samples. Immunohistochemically positive proteins showed higher P-score >1.0. As for PTEN and HSP90, the expression levels in Western blotting comparatively corresponded with the immunohistochemical results. T: tumor tissue; N: normal tissue.
