# Supplementary material for: Elevated expression of HSP90 and the antitumor effect of an HSP90 inhibitor via inactivation of the Akt/mTOR pathway in undifferentiated pleomorphic sarcoma
Source: PubMed Central journal article supplement (PMC4623920; doi:10.1186/s12885-015-1830-8), 2015-10-26
Supplement: 12885_2015_1830_MOESM4_ESM.pdf [file 12885_2015_1830_MOESM4_ESM.pdf]

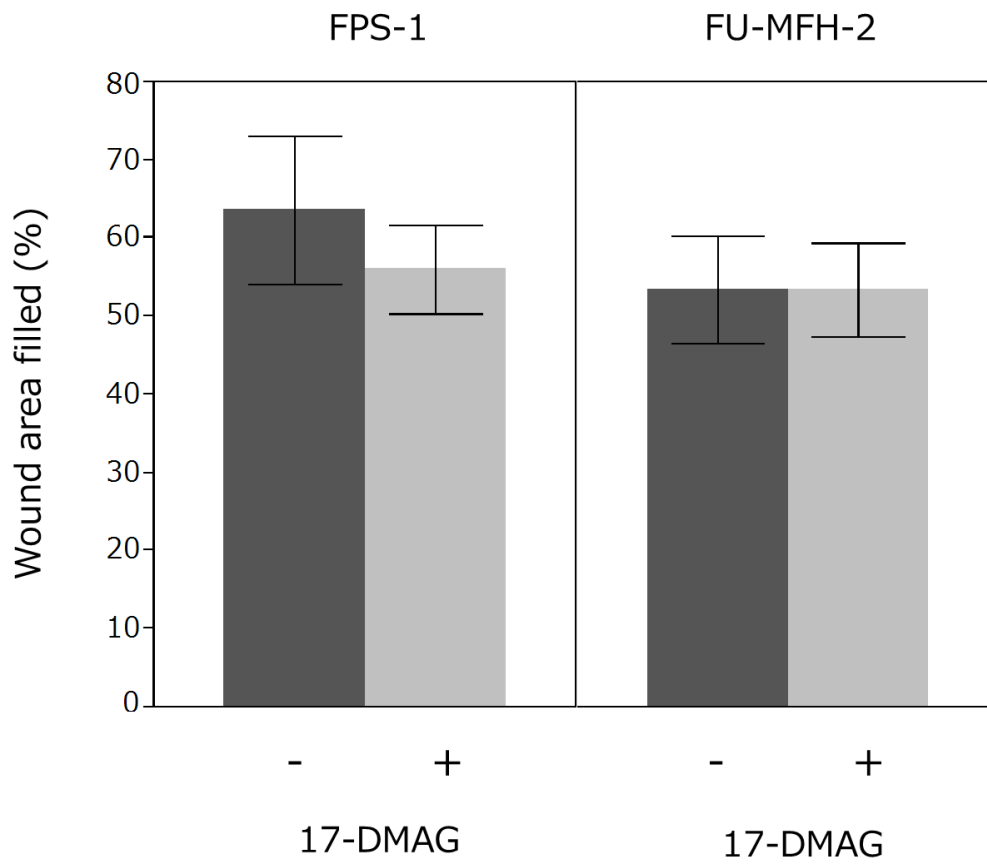

**Additional Fig. 2** Wound-healing assay showed 17-DMAG had no influence on the cell motility in both cell lines.
